# Supplementary material for: A MoS2 nanosheet–reduced graphene oxide hybrid: an efficient electrocatalyst for electrocatalytic N2 reduction to NH3 under ambient conditions
Source: Royal Society of Chemistry journal article supplement (doi:10.1039/c8ta10433f), 2019-01-01
Supplement: c8ta10433f1.pdf [file c8ta10433f1.pdf]

## Electronic Supplementary Information

### Experimental

*Materials:* Sodium molybdate ( $\text{Na}_2\text{MoO}_4$ ), lithium perchlorate ( $\text{LiClO}_4$ ), thiourea ( $\text{CH}_4\text{N}_2\text{S}$ ), ammonium chloride ( $\text{NH}_4\text{Cl}$ ), salicylic acid ( $\text{C}_7\text{H}_6\text{O}_3$ ), sodium citrate dehydrate ( $\text{C}_6\text{H}_5\text{Na}_3\text{O}_7 \cdot 2\text{H}_2\text{O}$ ), *p*-dimethylaminobenzaldehyde ( $\text{C}_9\text{H}_{11}\text{NO}$ ), sodium nitroferricyanide dihydrate ( $\text{C}_5\text{FeN}_6\text{Na}_2\text{O} \cdot 2\text{H}_2\text{O}$ ), sodium hypochlorite solution ( $\text{NaClO}$ ) and graphite powder were purchased from Aladdin Ltd. (Shanghai, China). Nafion (5 wt%) solution was purchased from Sigma-Aldrich Chemical Reagent Co., Ltd. Hydrochloric acid, nitric acid, sulfuric acid, hydrogen peroxide, hydrazine monohydrate ( $\text{N}_2\text{H}_4 \cdot \text{H}_2\text{O}$ ), and ethyl alcohol ( $\text{C}_2\text{H}_5\text{OH}$ ) were purchased from Kelong chemical Ltd. The ultrapure water used throughout all experiments was purified through a UP system. All reagents were analytical reagent grade without further purification.

*Preparation of  $\text{MoS}_2$  reduced graphene oxide hybrid:* Firstly, GO was synthesized by a modified Hummer's method. Then the GO suspension (30mg) and  $\text{Na}_2\text{MoO}_4$  (300mg) solution were mixed. The mixed solutions (30 mL) were stirred for 10 minutes. After that, 0.63 g of  $\text{CH}_4\text{N}_2\text{S}$  was added and dissolved in the mixture. The resulting mixture was ultrasonicated for 30 min and then transferred to a 50 mL Teflon-lined stainless-steel autoclave for 24 h at 200 °C. The resulting product was collected by centrifugation at 6000rpm about 5 min, and washed with deionized water and absolute ethanol for several times and dried at room temperature under vacuum for 24 h followed by further thermal treatment at 800 °C in an Ar environment for 2 h. It should be noted that GO was translated into rGO in the process of reaction. The resulted composites were denoted as  $\text{MoS}_2$ -rGO. For comparison, we also synthesized rGO or  $\text{MoS}_2$  without the addition of  $\text{Na}_2\text{MoO}_4$  or GO under the same conditions.

*Characterizations:* XRD analysis was performed using a LabX XRD-6100 X-ray diffractometer with Cu  $K\alpha$  radiation ( $\lambda = 1.5418 \text{ \AA}$ ) at 40 kV and 40 mA. SEM images were collected on a XL30 ESEM FEG scanning electron microscope at an accelerating voltage of 20 kV. The structures of the samples were determined by TEM

images on a HITACHI H-8100 electron microscopy (Hitachi, Tokyo, Japan) operated at 200 kV. XPS measurements were performed on an ESCALABMK II X-ray photoelectron spectrometer using Mg as the exciting source. Raman spectra were obtained by a Renishaw Invia confocal Raman microprobe at 532 nm laser excitation. The absorbance data of spectrophotometer were measured on UV-Vis spectrophotometer. The specific surface area of nitrogen sorption isotherms was performed at -196°C in a Micromeritics Instrument Corporation TriStar II 3020 volumetric adsorption system. The data of ion chromatography were measured on Swiss Wang tong ECO. <sup>1</sup>H-NMR measurements were performed on a Bruker Avance III 400 MHz spectrometer and dimethyl sulfoxide-d<sub>6</sub> was used as an internal to calibrate the chemical shifts in the spectra.

*Electrochemical Measurements:* Electrochemical NRR measurements were performed in a two-compartment cell separated by Nafion 211 membrane using a CHI 660E electrochemical analyzer (CH Instruments, Inc.). The electrochemical experiments were carried out with a three-electrode configuration using graphite rod as the counter electrode and Ag/AgCl electrode (saturated KCl) as the reference electrode. The working electrode was a CP with catalysts. In a typical synthesis of electrode, 10 mg of the catalyst was dispersed in 1 mL of alcohol containing Nafion solution (5 wt %), followed by ultrasonic treatment for 30 min to form a homogeneous ink. Then, 10 μL of the ink was loaded onto a carbon paper electrode with area of 1 x 1 cm<sup>2</sup> and dried under ambient condition, the catalyst loading mass is 0.1 mg. The potentials reported in this work were converted to RHE scale via calibration with the following equation:  $E \text{ (vs. RHE)} = E \text{ (vs. Ag/AgCl)} + 0.256 \text{ V}$  and the presented current density was normalized to the geometric surface area. For electrochemical N<sub>2</sub> reduction, chronoamperometry tests were conducted in N<sub>2</sub>-saturated 0.1 M LiClO<sub>4</sub> solution (LiClO<sub>4</sub> electrolyte was purged with N<sub>2</sub> for 30 min before measurement).

*Determination of NH<sub>3</sub>:* Concentration of produced NH<sub>3</sub> was spectrophotometrically determined by the indophenol blue method.<sup>1</sup> Typically, 2 mL electrolyte was taken from the cathodic chamber, and then 2 mL of 1 M NaOH solution containing 5% salicylic acid and 5% sodium citrate was added into this solution. Subsequently, 1 mL

of 0.05 M NaClO and 0.2 mL of 1% C<sub>5</sub>FeN<sub>6</sub>Na<sub>2</sub>O·2H<sub>2</sub>O were added into the above solution. After standing at room temperature for 1 h, UV-Vis absorption spectrum was measured at a wavelength of 655 nm. The concentration-absorbance curves were calibrated using standard NH<sub>3</sub> solution with a series of concentrations. The fitting curve ( $y = 0.2377x + 0.02499$ ,  $R^2 = 0.997$ ) shows good linear relation of absorbance value with NH<sub>3</sub> concentration by three times independent calibrations.

*Determination of hydrazine (N<sub>2</sub>H<sub>4</sub>):* N<sub>2</sub>H<sub>4</sub> presented in the electrolyte was estimated by the method of Watt and Chrisp.<sup>2</sup> A mixed solution of 5.99 g C<sub>9</sub>H<sub>11</sub>NO, 30 mL HCl and 300 mL ethanol was used as a color reagent. Calibration curve was plotted as follows: firstly, preparing a series of reference solutions; secondly, adding 5 mL above prepared color reagent and stirring 20 min at room temperature; finally, the absorbance of the resulting solution was measured at 455 nm, and the yields of N<sub>2</sub>H<sub>4</sub> were estimated from a standard curve using 5 mL residual electrolyte and 5 mL color reagent. Absolute calibration of this method was achieved using N<sub>2</sub>H<sub>4</sub>·H<sub>2</sub>O solutions of known concentration as standards, and the fitting curve shows good linear relation of absorbance with N<sub>2</sub>H<sub>4</sub>·H<sub>2</sub>O concentration ( $y = 0.6166x + 0.0398$ ,  $R^2 = 0.997$ ) by three times independent calibrations.

*FE determination:* The FE for N<sub>2</sub> reduction was defined as the amount of electric charge used for synthesizing NH<sub>3</sub> divided the total charge passed through the electrodes during the electrolysis. The total amount of NH<sub>3</sub> produced was measured using colorimetric methods. Assuming three electrons were needed to produce one NH<sub>3</sub> molecule, the FE could be calculated as follows:

$$FE = 3 \times F \times [\text{NH}_4^+] \times V / (17 \times Q)$$

The rate of NH<sub>3</sub> formation was calculated using the following equation:

$$\text{Ammonia formation rate} = [\text{NH}_4^+] \times V / (m \times t)$$

Where F is the Faraday constant, C<sub>NH<sub>3</sub></sub> is the measured NH<sub>3</sub> concentration, V is the volume of the LiClO<sub>4</sub> electrolyte for NH<sub>3</sub> collection, t is the reduction time and m<sub>cat.</sub> is the catalyst mass.

*Computational Details:* All DFT calculations were carried out using the Vienna Ab

initio Simulation Package (VASP).<sup>3,4</sup> The interaction between valence electron and ion core is described by the projector-augmented wave method (PAW).<sup>5</sup> Generalized gradient approximation (GGA) with Perdew–Burke–Ernzerhof (PBE) functional<sup>6</sup> is applied to describe the electron exchange-correlation. For the MoS<sub>2</sub>/graphene systems, theoretical studies have been reported to understand the structural and electrical properties.<sup>7–10</sup> Recently studies have shown that the edge of MoS<sub>2</sub> is electrocatalytically active site and the Mo-edge plays the key role for N<sub>2</sub> reduction reaction.<sup>11</sup> In order to understand the effect of graphene on the N<sub>2</sub> reduction on MoS<sub>2</sub> edge, the structure of MoS<sub>2</sub>-rGO was constructed. The reported band structure of MoS<sub>2</sub>-rGO showed that enormous bands appear at the Fermi level and the enhanced electron transfer mainly caused by the MoS<sub>2</sub> edges,<sup>7</sup> which is responsible for the enhanced catalytic activity observed in our experiment.

Herein, we mainly considered the N<sub>2</sub> reduction process on the MoS<sub>2</sub>-rGO structure. The (5×5) graphene–(4×4) MoS<sub>2</sub> was adopted to minimize the lattice mismatch of the sample. The width of MoS<sub>2</sub> is about 10 Å and the distance between the MoS<sub>2</sub> with its periodic image is 15.59 Å, which is large enough to avoid artificial interactions displayed in Figure A. The van der Waals (vdW) correction by Grimme’s DFT-D2 method<sup>12</sup> is further added to describe the non-bonded interaction between MoS<sub>2</sub> and graphene. The cutoff of kinetic energy was 450 eV and the total energy was converged to less than 10<sup>-5</sup> eV. The atomic positions were optimized until the force on each atom was less 0.02 eV/Å and dipole corrections in the z direction were considered. In order to improve efficiency, the larger supercell was optimized with the Brillouin zone sampling limited to the gamma point. The vacuum layer of 15 Å thickness was set to avoid the interaction between the periodic images. The Gibbs free energy (*G*) of a species is calculated by

$$G = E + \text{ZPE} - TS$$

where *E* is the total energy of adsorbed species from DFT calculations, ZPE and *S* are the zero-point energy and entropy of a species respectively, and T = 298.15 K. Thermal corrections for gas molecules are from database.<sup>13</sup>

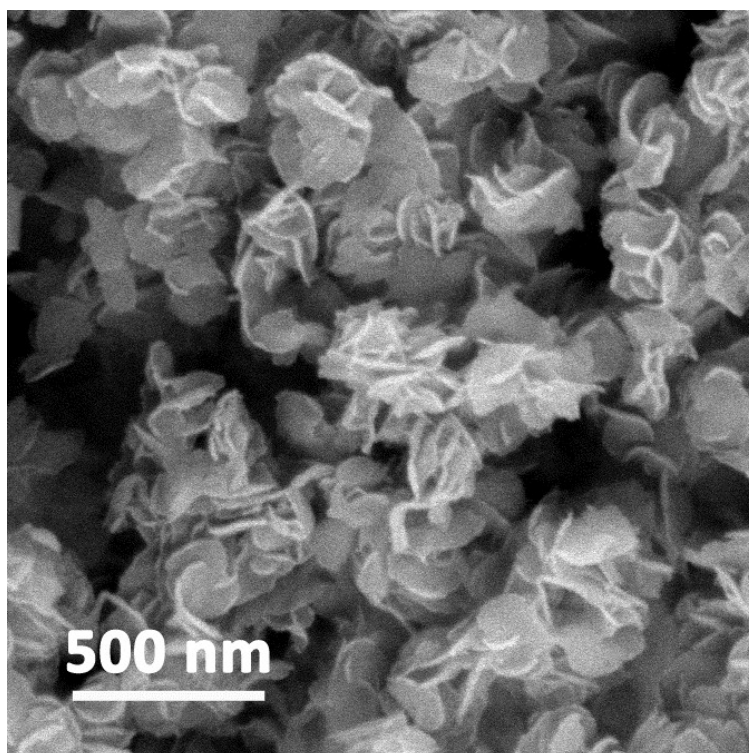

**Fig. S1.** SEM image of MoS<sub>2</sub>.

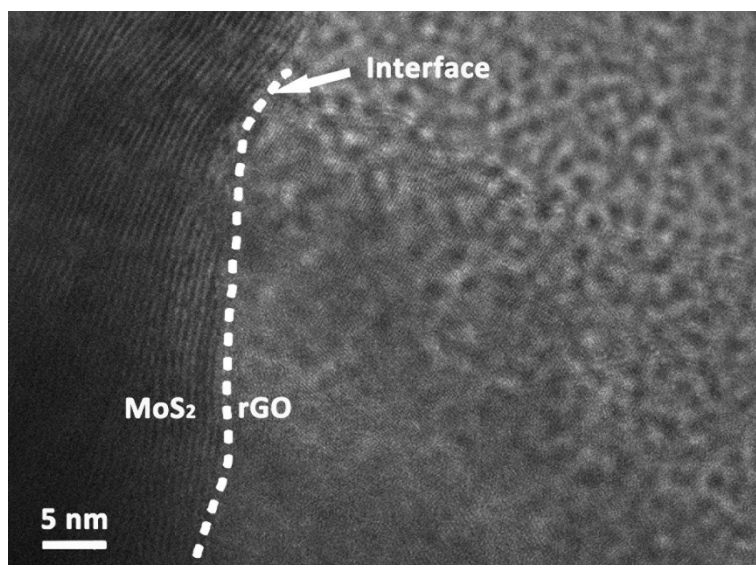

**Fig. S2.** HRTEM image for MoS<sub>2</sub>-rGO hybrid.

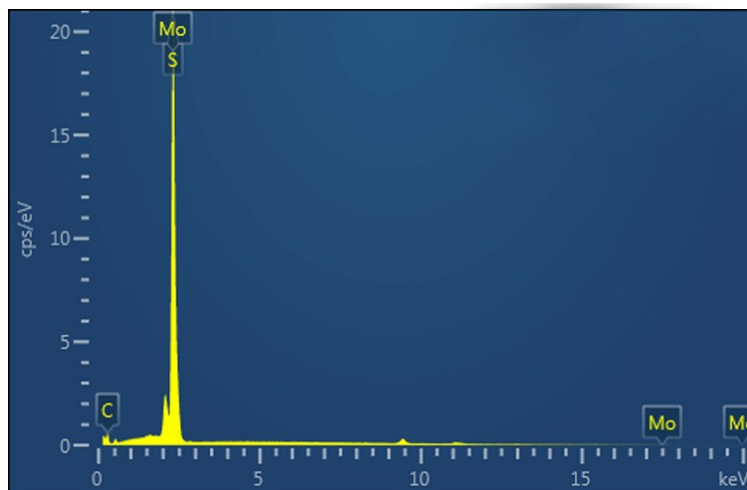

**Fig. S3.** EDX spectrum of MoS<sub>2</sub>-rGO.

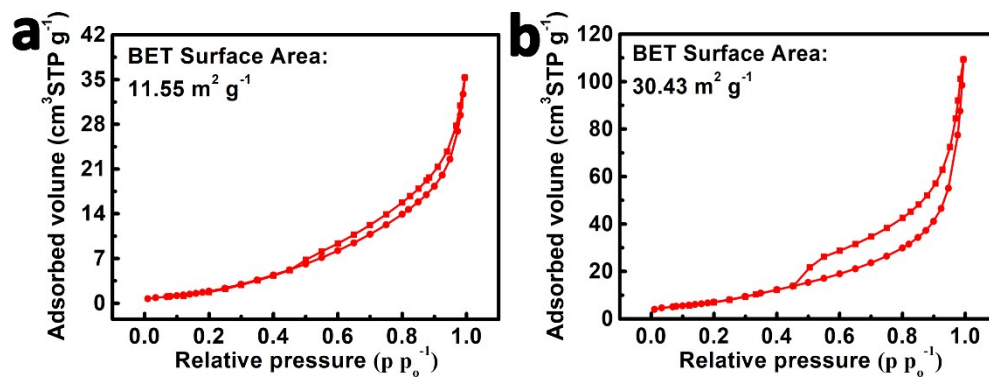

**Fig. S4.** The N<sub>2</sub> adsorption curve of (a) MoS<sub>2</sub> and (b) MoS<sub>2</sub>-rGO.



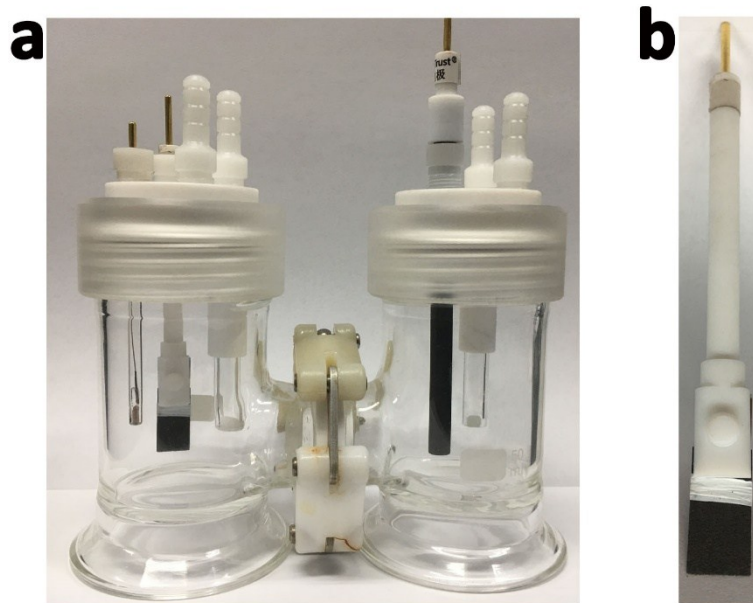

**Fig. S5.** (a) Optical photograph of the reactor. (b) Optical photograph of the prepared cathode.

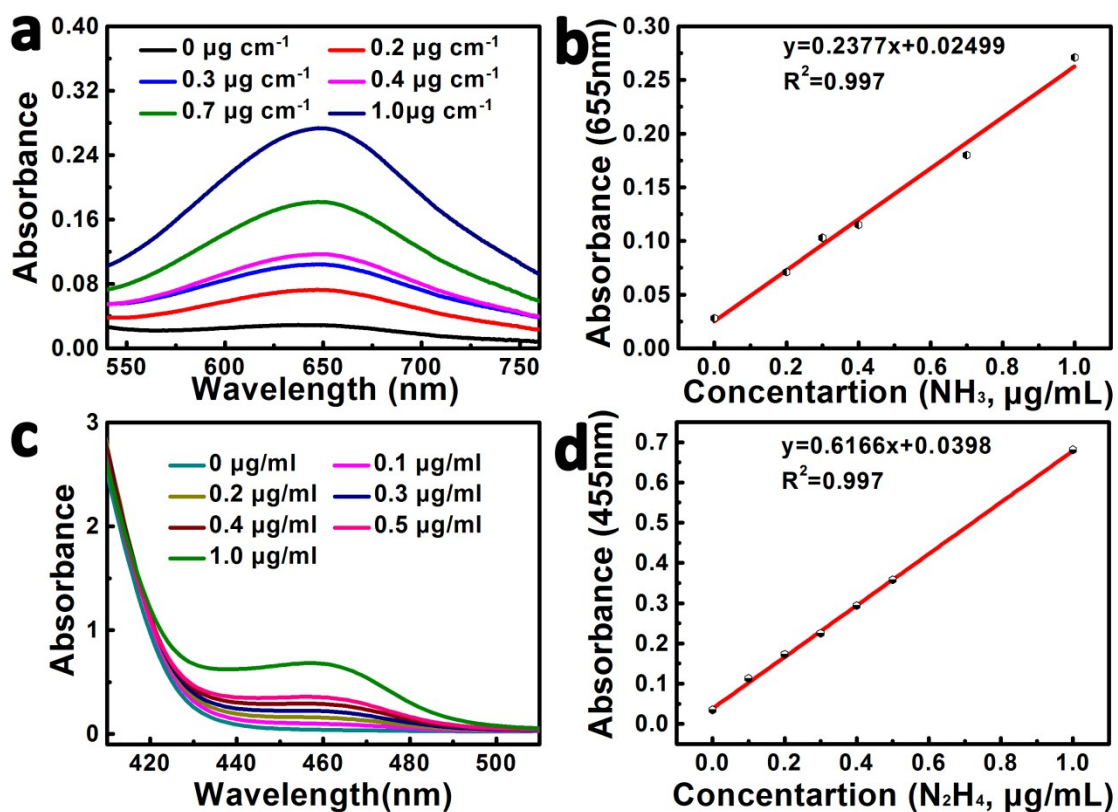

**Fig. S6.** (a) UV-Vis spectra of indophenol assays with  $\text{NH}_4^+$  ions after incubated for 2 h at room temperature. (b) Calibration curve used for estimation of  $\text{NH}_3$ . (c) UV-Vis absorption spectra of various  $\text{N}_2\text{H}_4$  concentrations after incubation for 20 min at room temperature. (d) Calibration curve used for calculation of  $\text{N}_2\text{H}_4$  concentrations.

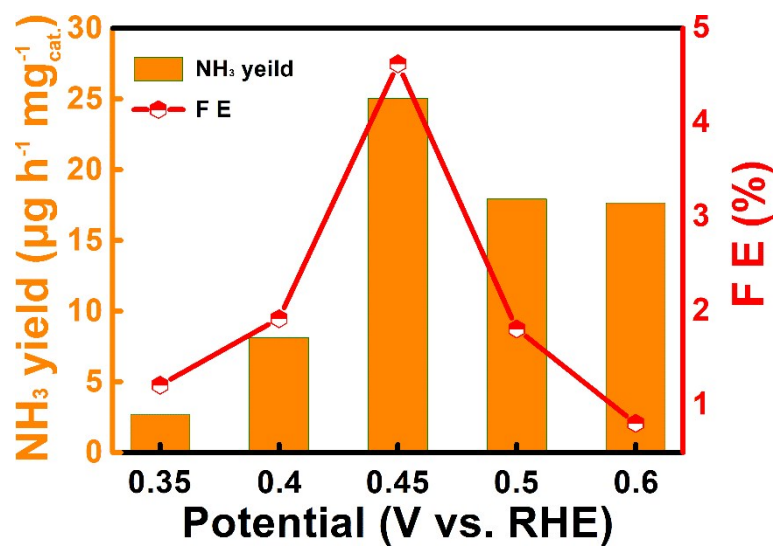

**Fig. S7.** NH<sub>3</sub> yields and FEs for MoS<sub>2</sub>-rGO/CPE at a series of potentials for 2h obtained by ion chromatography.

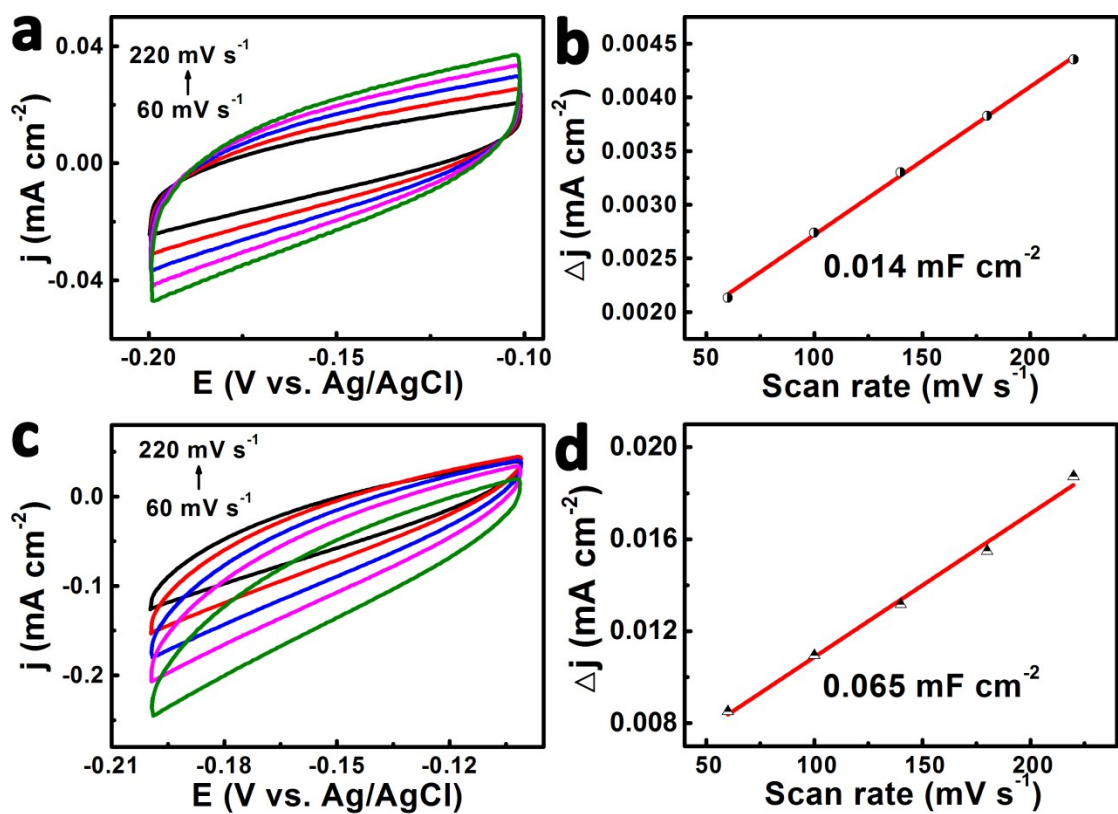

**Fig. S8.** (a) CVs and (b) capacitive current densities of MoS<sub>2</sub>/CPE. (c) CVs and (d) capacitive current densities of MoS<sub>2</sub>-rGO/CPE.

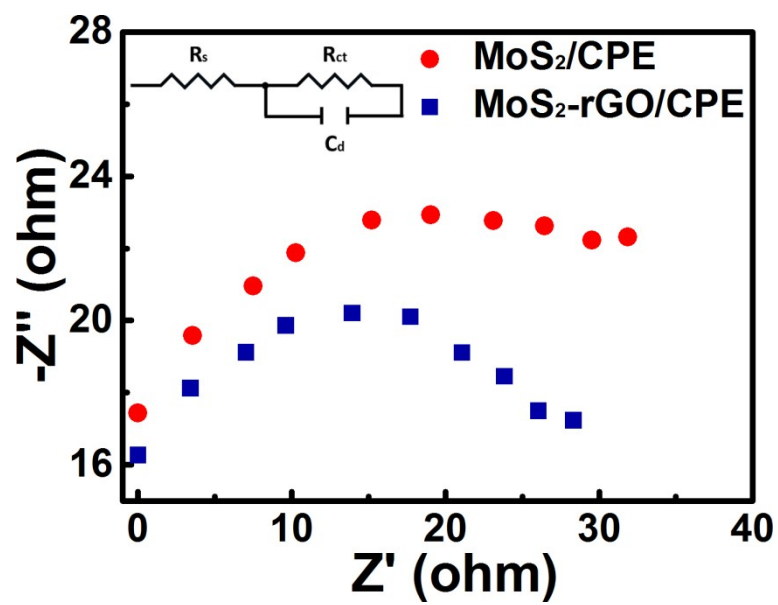

Fig. S9. Nyquist plots of MoS<sub>2</sub>-rGO/CPE and MoS<sub>2</sub>/CPE.

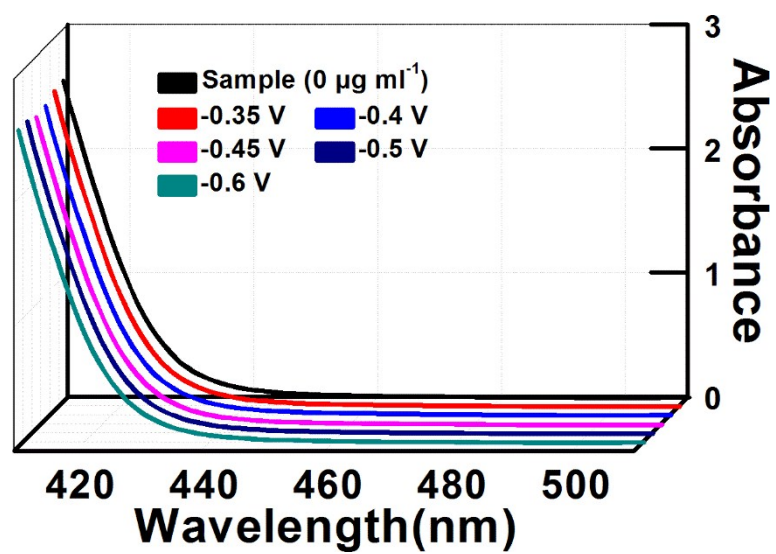

**Fig. S10.** UV-Vis absorption spectra of the electrolytes estimated by the method of Watt and Chrisp before and after electrolysis in  $\text{N}_2$ -saturated 0.1 M  $\text{LiClO}_4$  for  $\text{MoS}_2$ -rGO/CPE.

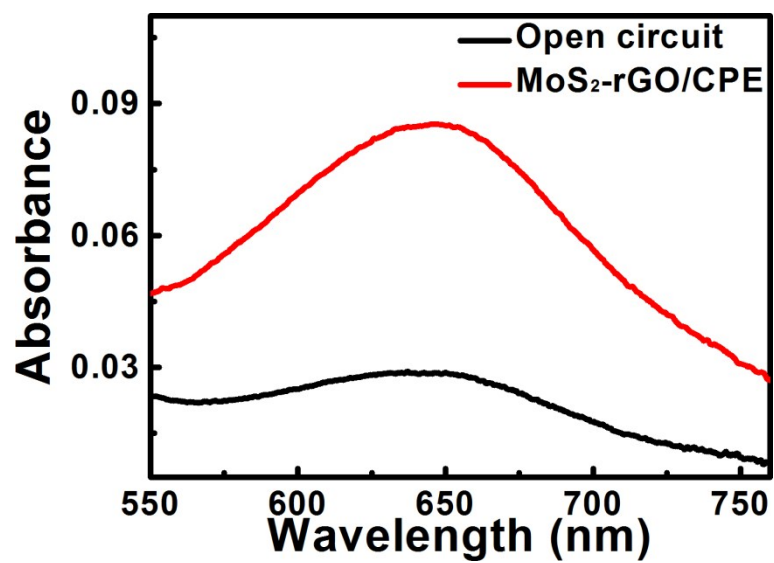

**Fig. S11.** UV-Vis absorption spectra of the electrolytes stained with indophenol indicator after 2-h electrolysis under different conditions.

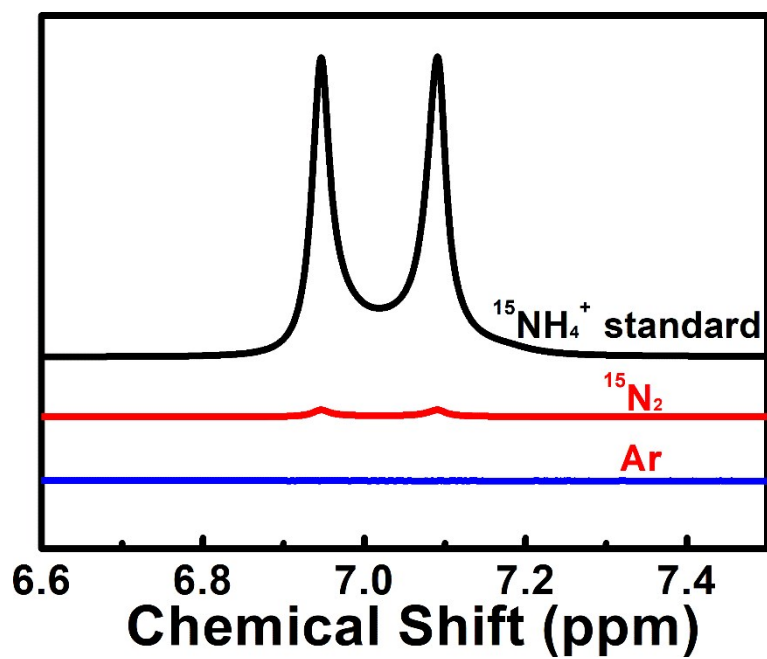

**Fig. S12.**  $^1\text{H}$  NMR spectra of  $^{15}\text{NH}_4^+$  calibration solution, after electrolysis at  $-0.45$  V under  $^{15}\text{N}_2$  and Ar atmosphere on the  $\text{MoS}_2\text{-rGO/CPE}$ .



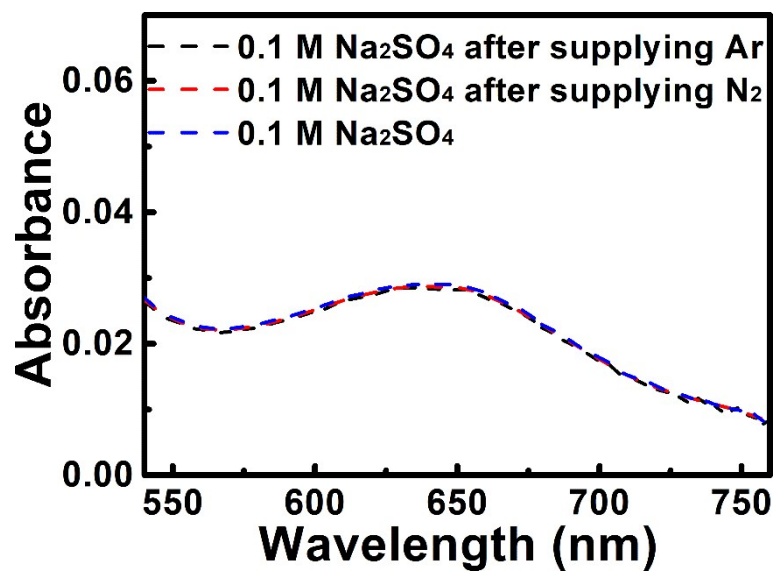

**Fig. S13.** UV-Vis absorption spectra of the 0.1 M Na<sub>2</sub>SO<sub>4</sub> electrolyte stained with indophenol indicator after continuously supplying N<sub>2</sub> or Ar with no applied voltage.

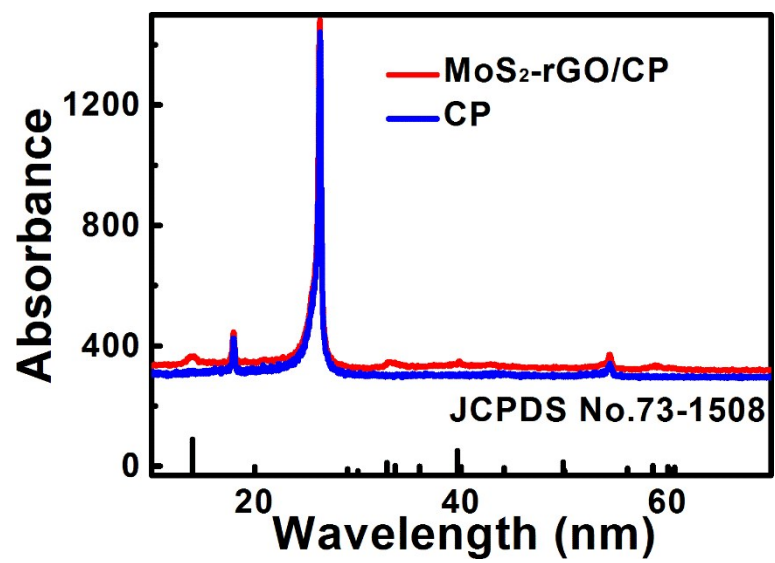

**Fig. S14.** XRD patterns for CP and MoS<sub>2</sub>-rGO/CP after stability test.

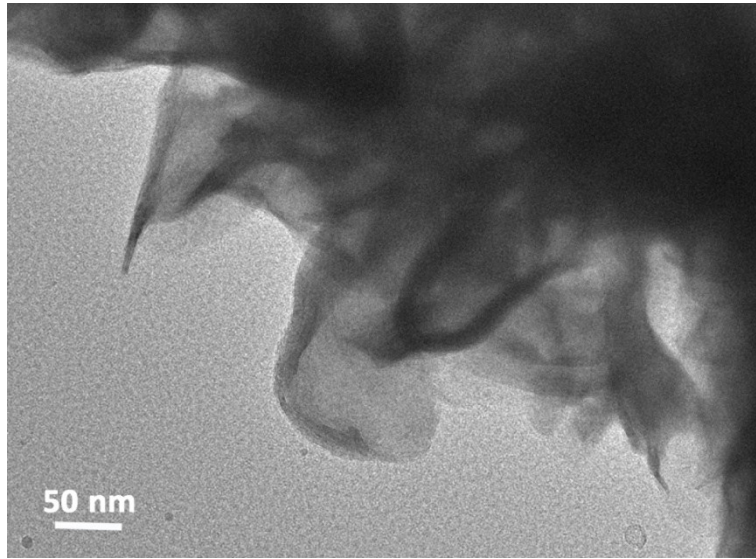

**Fig. S15.** TEM image for MoS<sub>2</sub>-rGO after stability test.

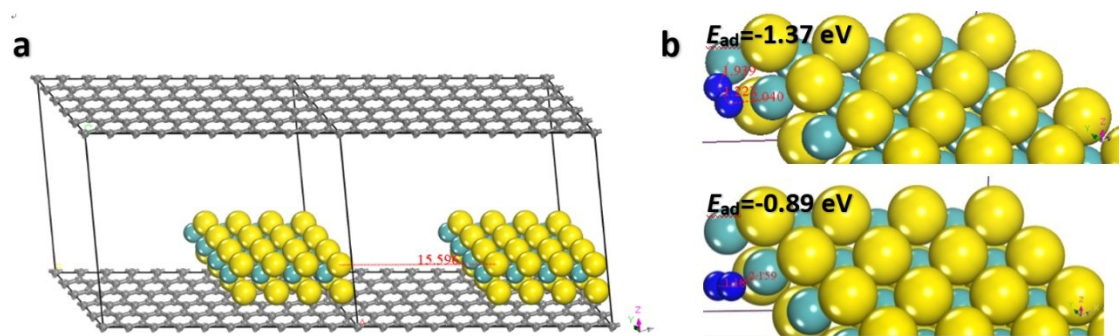

**Fig. S16.** (Left) Side view of MoS<sub>2</sub>-rGO. The green, yellow and grey balls represent Mo, S and C atoms, respectively. (Right) Different N<sub>2</sub> adsorption sites of MoS<sub>2</sub>. The blue ball represents N atom.

**Table S1.** Comparison of electrocatalytic N<sub>2</sub> reduction performance for MoS<sub>2</sub>-rGO with other electrocatalysts under ambient conditions.

| Catalyst                                                         | Electrolyte                           | NH <sub>3</sub> yield                                         | FE%         | Ref.             |
|------------------------------------------------------------------|---------------------------------------|---------------------------------------------------------------|-------------|------------------|
| <b>MoS<sub>2</sub>-rGO/CP</b>                                    | <b>0.1 M LiClO<sub>4</sub></b>        | <b>24.82 μg h<sup>-1</sup> mg<sup>-1</sup><sub>cat.</sub></b> | <b>4.58</b> | <b>This work</b> |
| Pd <sub>0.2</sub> Cu <sub>0.8</sub> /rGO                         | 0.1 M KOH                             | 2.8 μg h <sup>-1</sup> mg <sup>-1</sup> <sub>cat.</sub>       | 4.5         | 14               |
| Au nanorods                                                      | 0.1 M KOH                             | 1.6 μg h <sup>-1</sup> cm <sup>-2</sup>                       | 3.88        | 15               |
| AuHNCs                                                           | 0.5 M LiClO <sub>4</sub>              | 3.90 μg h <sup>-1</sup> cm <sup>-2</sup>                      | 30.2        | 16               |
| Ag nanosheet                                                     | 0.1 M HCl                             | 2.83 μg h <sup>-1</sup> cm <sup>-2</sup>                      | 4.8         | 17               |
| Rh                                                               | 0.1 M KOH                             | 23.88 μg h <sup>-1</sup> mg <sup>-1</sup> <sub>cat.</sub>     | 0.217       | 18               |
| Pd-Co/CuO                                                        | 0.1 M KOH                             | 10.04 μg h <sup>-1</sup> mg <sup>-1</sup> <sub>cat.</sub>     | 2.16        | 19               |
| Pd/C                                                             | 0.1M PBS                              | 4.5 μg h <sup>-1</sup> mg <sup>-1</sup> <sub>cat.</sub>       | 8.2         | 20               |
| Bi <sub>4</sub> V <sub>2</sub> O <sub>11</sub> /CeO <sub>2</sub> | 0.1 M HCl                             | 23.21 μg h <sup>-1</sup> mg <sup>-1</sup> <sub>cat.</sub>     | 10.16       | 21               |
| hollow Cr <sub>2</sub> O <sub>3</sub> microspheres               | 0.1 M Na <sub>2</sub> SO <sub>4</sub> | 25.3 μg h <sup>-1</sup> mg <sup>-1</sup> <sub>cat.</sub>      | 6.78        | 22               |
| γ-Fe <sub>2</sub> O <sub>3</sub>                                 | 0.1 M KOH                             | 0.212 μg h <sup>-1</sup> mg <sup>-1</sup> <sub>cat.</sub>     | 1.9         | 23               |
| Fe <sub>3</sub> O <sub>4</sub> /Ti                               | 0.1 M Na <sub>2</sub> SO <sub>4</sub> | 3.42 μg h <sup>-1</sup> cm <sup>-2</sup>                      | 2.6         | 24               |
| Fe <sub>2</sub> O <sub>3</sub> -CNT                              | KHCO <sub>3</sub>                     | 0.22 μg h <sup>-1</sup> cm <sup>-2</sup>                      | 0.15        | 25               |
| Mo nanofilm                                                      | 0.01 M H <sub>2</sub> SO <sub>4</sub> | 1.89 μg h <sup>-1</sup> cm <sup>-2</sup>                      | 0.72        | 26               |
| MoS <sub>2</sub> /CC                                             | 0.1 M Na <sub>2</sub> SO <sub>4</sub> | 4.94 μg h <sup>-1</sup> cm <sup>-2</sup>                      | 1.17        | 11               |
| Fe-N/C-CNTs                                                      | 0.1 M KOH                             | 34.83 μg h <sup>-1</sup> mg <sup>-1</sup> <sub>cat.</sub>     | 9.28        | 27               |
| MoN                                                              | 0.1 M HCl                             | 18.42 μg h <sup>-1</sup> cm <sup>-2</sup>                     | 1.15        | 28               |
| PEBCD/C                                                          | 0.5 M Li <sub>2</sub> SO <sub>4</sub> | 1.58 μg h <sup>-1</sup> cm <sup>-2</sup>                      | 2.85        | 29               |
| N-doped porous carbon                                            | 0.05 M H <sub>2</sub> SO <sub>4</sub> | 23.8 μg h <sup>-1</sup> mg <sup>-1</sup> <sub>cat.</sub>      | 1.42        | 30               |

**Table S2.** Data obtained from the ion chromatography for  $\text{NH}_4^+$  concentrations after electrolysis for 2h at a series of potentials.

| <b>Sample</b> | <b>Potential (V vs. RHE)</b> | <b>Concentration (<math>\text{NH}_4^+</math>, mg L<sup>-1</sup>)</b> |
|---------------|------------------------------|----------------------------------------------------------------------|
| 1             | -0.35                        | 0.0152                                                               |
| 2             | -0.4                         | 0.0464                                                               |
| 3             | -0.45                        | 0.1431                                                               |
| 4             | -0.5                         | 0.1024                                                               |
| 5             | -0.6                         | 0.1009                                                               |

## References

1. D. Zhu, L. Zhang, R. E. Ruther and R. J. Hamers, *Nat. Mater.*, 2013, **12**, 836–841.
2. G. W. Watt and J. D. Chrisp, *Anal. Chem.*, 1952, **24**, 2006–2008.
3. G. Kresse and J. Furthmuller, *Phys. Rev. B: Condens. Matter Mater. Phys.*, 1996, **54**, 11169–11186.
4. G. Kresse and J. Furthmuller, *Comput. Mater. Sci.*, 1996, **6**, 15–50.
5. P. E. Blöchl, *Phys. Rev. B: Condens. Matter Mater. Phys.*, 1994, **50**, 17953–17979.
6. J. P. Perdew, K. Burke and M. Ernzerhof, *Phys. Rev. Lett.*, 1996, **77**, 3865–3868.
7. M. Guo, Y. Yang, Y. Leng, L. Wang, H. Dong, H. Liu and W. Li, *J. Mater. Chem. C*, 2017, **5**, 4845–4851.
8. X. Li, S. Guo, W. Li, X. Ren, J. Su, Q. Song, A. J. Sobrido and B. Wei, *Nano Energy*, 2019, **57**, 388–397.
9. W. Hu, T. Wang, R. Zhang and J. Yang, *J. Mater. Chem. C*, 2016, **4**, 1776–1781.
10. X. Liu and Z. Li, *J. Phys. Chem. Lett.*, 2015, **6**, 3269–3275.
11. L. Zhang, X. Ji, X. Ren, Y. Ma, X. Shi, Z. Tian, A. M. Asiri, L. Chen, B. Tang and X. Sun, *Adv. Mater.*, 2018, **30**, 1800191.
12. S. Grimme, *J. Comput. Chem.*, 2006, **27**, 1787–1799.
13. D. R. Lide, Ed. CRC Handbook of Chemistry and Physics, 85th ed.; CRC Press: Boca Raton, FL, 2004.
14. M. Shi, D. Bao, S. Li, B. Wulan, J. Yan and Q. Jiang, *Adv. Energy Mater.*, 2018, **8**, 1800124.
15. D. Bao, Q. Zhang, F. Meng, H. Zhong, M. Shi, Y. Zhang, J. Yan, Q. Jiang and X. Zhang, *Adv. Mater.*, 2017, **29**, 1604799.
16. M. Nazemia, S. R. Panikkanvalappila and M. A. E. Sayed, *Nano Energy*, 2018, **49**, 316–323.

17. H. Huang, L. Xia, X. Shi, A. M. Asiri, and X. Sun, *Chem. Commun.*, 2018, **54**, 11427–11430.
18. H. Liu, S. Han, Y. Zhao, Y. Zhu, X. Tian, J. Zeng, J. Jiang, B. Xia and Y. Chen, *J. Mater. Chem. A*, 2018, **6**, 3211–3217.
19. W. Fu, Y. Cao, Q. Feng, W. R. Smith, P. Dong, M. Ye\* and J. Shen, *Nanoscale*, 2019, DOI:10.1039/C8NR08724E.
20. J. Wang, L. Yu, L. Hu, G. Chen, H. Xin and X. Feng, *Nat. Commun.*, 2018, **9**, 1795.
21. C. Lv, C. Yan, G. Chen, Y. Ding, J. Sun, Y. Zhou and G. Yu, *Angew. Chem., Int. Ed.*, 2018, **57**, 6073–6076.
22. Y. Zhang, W. Qiu, Y. Ma, Y. Luo, Z. Tian, G. Cui, F. Xie, L. Chen, T. Li, and X. Sun, *ACS Catal.*, 2018, **8**, 8540–8544.
23. J. Kong, A. Lim, C. Yoon, J. H. Jang, H. C. Ham, J. Han, S. Nam, D. Kim, Y. E. Sung, J. Choi and H. S. Park, *ACS Sustain. Chem. Eng.*, 2017, **5**, 10986–10995.
24. Q. Liu, X. Zhang, B. Zhang, Y. Luo, G. Cui, F. Xie, and X. Sun, *Nanoscale*, 2018, **10**, 14386–14389.
25. S. Chen, S. Perathoner, C. Ampelli, C. Mebrahtu, D. Su and G. Centi, *Angew. Chem., Int. Ed.*, 2017, **56**, 2699–2703.
26. D. Yang, T. Chen and Z. Wang, *J. Mater. Chem. A*, 2017, **5**, 18967–18971.
27. Y. Wang, X. Cui , J. Zhao , G. Jia, L. Gu, Q. Zhang, L. Meng, Z. Shi, L. Zheng, C. Wang, Z. Zhang, and W. Zheng, *ACS Catal.*, 2019, **9**, 336–344.
28. L. Zhang, X. Ji, X. Ren, Y. Luo, X. Shi, A. M. Asiri, B. Zheng, and X. Sun, *ACS Sustainable Chem. Eng.*, 2018, **6**, 9550–9554.
29. G. Chen, X. Cao, S. Wu, X. Zeng, L. Ding, M. Zhu and H. Wang, *J. Am. Chem. Soc.*, 2017, **139**, 9771–9774.
30. Y. Liu, Y. Su, X. Quan, X. Fan, S. Chen, H. Yu, H. Zhao, Y. Zhang and J. Zhao, *ACS Catal.*, 2018, **8**, 1186–1191.
